# Supplementary material for: A bidirectional network for appetite control in larval zebrafish
Source: eLife. 2019 Oct 18;8:e43775. doi: 10.7554/eLife.43775 (PMC6799978; doi:10.7554/eLife.43775)
Supplement: Figure 1—source data 1. [file elife-43775-fig1-data1.xlsx]

## Sheet: Figure 1a
	Fed							Food-deprived
Time (min)	1	15	30	60	150		Time (min)	1	15	30	60	150
1	565.006	26593.2	51342.9	89721.6	11181.1		1	7472.05	129730	51358	92167.5	62293.5
2	565.006	40221.8	23613	31834	15267		2	5469.98	131070	107049	105117	30016.8
3	565.006	77770.1	46363	30638.1	1816		3	14658.1	123071	101956	92389.4	4475.95
4	5118.98	19814	35651.7	73125.2	26771.1		4	4996.02	87354.2	85893.2	44313.3	5773.95
5	824.007	32793.9	47407.1	16913.9	32060.9		5	20028.2	61724.8	86140.4	42586.7	59696.8
6	7630.93	10434.9	34901.8	1798.99	1805.01		6	14035.9	69239.9	88787	49650.3	10724.1
7	5610.97	4881.97	45148.3	46902.9	13338		7	4393.02	45144.2	100455	63109.6	88387.8
8	NaN	29396.1	19813.8	37056	7174.07		8	14583.9	37372.2	62931.7	67647.4	30310.9
9	NaN	68718.6	45995.9	103669	22854.1		9	NaN	58036.9	81198.3	91151.1	8653
10	NaN	36864	19611.1	72316	10075.1		10	NaN	14253	25129.9	22473.9	7731.06
11	NaN	34719.1	13862.9	24210.9	2465		11	NaN	33917	55034.8	92391.3	38711.8
12	NaN	20157.1	41935	9751.1	52833.9		12	NaN	6798.96	57467	119972	45372.9
13	NaN	19440	26324.1	26484	30826		13	NaN	120478	74344.6	33176.7	9200.07
14	NaN	32776.9	47035.1	12714.9	5556.98		14	NaN	13344	84351.5	52094	37366.1
15	NaN	14120.1	30427.8	14764.1	12122		15	NaN	75140.4	67221.9	NaN	14323.8
16	NaN	11516.9	64203.7	34192.2	11305		16	NaN	152185	44137.9	NaN	NaN
17	NaN	4721.98	20587	12362.1	30529.1		17	NaN	77136.2	33755.8	NaN	NaN
18	NaN	4113.04	11276	NaN	NaN		18	NaN	125633	106250	NaN	NaN
19	NaN	NaN	38383.9	NaN	NaN		19	NaN	11068.9	63394.3	NaN	NaN
							20	NaN	24313.8	95607.3	NaN	NaN
							21	NaN	27482.1	NaN	NaN	NaN
							22	NaN	1849.99	NaN	NaN	NaN
							23	NaN	58162.9	NaN	NaN	NaN

## Sheet: Figure 1c
LH			cH
Fed	Dep + food		Fed	Dep + food
1	1.17101		1	0.973916
1	1.22574		1	0.940339
1	1.27085		1	0.978052
1	1.31491		1	0.979317
1	1.41888		1	0.939776
1	1.07631		1	0.971524
1	1.33502		1	0.915539
1	1.21567		1	0.97884
1	1.19205		1	0.908473

## Sheet: Figure 1g
Mean fluorescence								Cell Count
cH	Fed	Dep.	5 min food	15 min food	30 min food	2 hr food
1	1.04728	1.2793	0.861182	0.936305	0.901062	0.933966
2	0.990821	1.05572	0.961566	0.834408	0.918436	1.0285
3	1.0409	1.22492	0.904428	0.868355	0.968283	1.0933
4	0.995891	1.07624	0.799289	1.128	0.899611	1.07311
5	1.0948	1.16188	1.00327	1.13188	0.813415	1.17217
6	0.959294	1.08063	0.924316	0.813577	0.923211	0.998815
7	1.00538	1.00355	0.920613	0.913905	1.00065	1.01215
8	0.933894	1.0292	0.922164	0.937703	1.11971	0.924675
9	0.879956	0.979972	0.97273	0.998562	1.0221	1.13777
10	1.16972	0.935756	NaN	NaN	0.750511	1.08487
11	0.958169	1.39248	NaN	NaN	1.33853	1.10063
12	0.972193	NaN	NaN	NaN	0.865376	0.985348
13	0.95178	NaN	NaN	NaN	1.14235	NaN
mLH	Fed	Dep.	5 min food	15 min food	30 min food	2 hr food		Fed	Dep.	5 min food	15 min food	30 min food	2 hr food
1	1.02569	0.85774	1.28788	1.28705	1.14791	0.930673		91.5	30.5	70.5	124.5	90.5	16
2	0.98856	0.993977	1.4706	0.95976	0.979916	1.0201		40.5	12.5	155.5	27.5	71	75.5
3	0.922636	0.902737	1.19588	1.14498	0.913369	0.918629		42	3	83	112	22	23.5
4	1.25447	0.873966	1.20392	0.936683	0.923437	0.835125		95.5	30.5	118.5	70.5	31	20
5	0.761875	0.906627	1.37369	1.32033	0.947926	0.895202		4	16	146	159	59	19
6	0.895268	0.935942	1.31087	1.00534	1.1883	1.21245		32.5	20.5	141	63.5	117	151
7	1.08671	0.839268	1.1241	1.03022	0.886676	0.872818		50.5	4	85.5	90	31	22
8	1.05458	0.979414	1.21812	1.37816	1.06607	1.50639		78.5	32.5	97	190	100	195
9	0.834936	0.894127	1.33193	1.26605	1.03019	1.10586		21.5	9.5	177.5	216	45	101
10	0.812825	0.8811	NaN	NaN	1.31608	0.977146		13.5	4.5	NaN	NaN	201.5	64
11	0.874704	0.914735	NaN	NaN	0.952506	1.16422		33.5	12.5	NaN	NaN	13	97.5
12	1.16277	NaN	NaN	NaN	1.04512	1.1066		99	NaN	NaN	NaN	80.5	87
13	1.32499	NaN	NaN	NaN	0.929839	NaN		154	NaN	NaN	NaN	22	NaN
lLH	Fed	Dep.	5 min food	15 min food	30 min food	2 hr food		Fed	Dep.	5 min food	15 min food	30 min food	2 hr food
1	1.01133	0.916338	1.19426	1.32013	1.13373	1.05307		20	3	53	56.5	31	30.5
2	1.03775	0.935745	1.41432	0.934999	1.1123	1.0066		21	1	81	4.5	40.5	19
3	0.949328	0.966398	1.06008	1.04044	0.925737	1.0051		17	7.5	37.5	30.5	0.5	16.5
4	1.04929	0.890822	0.996696	0.871422	0.90434	0.872988		10.5	6	28.5	18	20	2
5	0.818044	0.841629	1.30084	0.981294	0.875537	0.998459		12.5	0	84	11	13	8.5
6	0.905988	0.949587	1.01036	0.886525	1.00756	1.1083		13	3	7.5	2	17.5	50.5
7	0.98975	0.868774	0.937694	0.995692	0.93124	0.838278		2	1	10	24	23.5	9
8	0.981134	1.04437	1.01168	1.15001	1.00572	1.33691		23	3.5	37	36	28	58.5
9	0.898784	1.04263	0.798421	0.964764	1.0835	1.0269		6.5	7.5	33	33.5	25	25.5
10	0.87529	0.901132	NaN	NaN	1.05154	1.03271		11	0	NaN	NaN	21	15
11	0.983437	0.957044	NaN	NaN	0.861946	0.993146		21	0	NaN	NaN	7	16.5
12	1.20388	NaN	NaN	NaN	1.02914	0.980046		48	NaN	NaN	NaN	34.5	22.5
13	1.29601	NaN	NaN	NaN	0.847484	NaN		100.5	NaN	NaN	NaN	3	NaN
