# Supplementary material for: A bidirectional network for appetite control in larval zebrafish
Source: eLife. 2019 Oct 18;8:e43775. doi: 10.7554/eLife.43775 (PMC6799978; doi:10.7554/eLife.43775)
Supplement: Figure 2—source data 1. [file elife-43775-fig2-data1.xlsx]

## Sheet: Sheet1
Mean fluorescence							Cell Count
cH	Fed	Dep. 30 min	Dep. 30 min food	Dep. 2hr	Dep 2hr food
1	0.907208	0.859437	0.895827	1.18442	0.771032
2	1.13227	1.04888	0.953329	1.62195	0.850498
3	0.918311	1.46917	1.00257	1.13652	0.787316
4	0.959558	0.956088	1.37418	1.12513	0.971493
5	1.07018	0.965388	1.26525	1.22044	0.915352
6	1.01248	0.999582	NaN	1.32529	0.980219
6	NaN	0.995949	NaN	NaN	NaN
mLH	Fed	Dep. 30 min	Dep. 30 min food	Dep. 2hr	Dep 2hr food		Fed	Dep. 30 min	Dep. 30 min food	Dep. 2hr	Dep 2hr food
1	0.974317	0.808903	0.752444	1.27521	2.02757		9	2.5	9.5	0	97.5
2	1.15373	1.02206	0.923854	0.852154	2.01382		19.5	19	23	4	98.5
3	0.859294	1.3231	0.900937	0.980162	1.95342		3.5	16.5	9	5	82.5
4	1.01482	0.866918	0.954262	0.947846	1.56277		7.5	4	12.5	14.5	102.5
5	0.973165	1.42746	1.11619	1.03605	2.26771		13.5	2.5	20	6	89.5
6	1.02467	1.01261	NaN	0.953595	1.17558		43.5	10.5	NaN	1.5	37.5
7	NaN	0.820207	NaN	NaN	NaN		NaN	7.5	NaN	NaN	NaN
lLH	Fed	Dep. 30 min	Dep. 30 min food	Dep. 2hr	Dep 2hr food		Fed	Dep. 30 min	Dep. 30 min food	Dep. 2hr	Dep 2hr food
1	0.93346	0.793534	0.74288	1.22791	1.4674		6	1	13.5	0	51.5
2	1.15593	0.902787	0.853612	0.907979	1.24019		23	3	15	0	19.5
3	0.867763	1.03907	0.902466	0.938349	1.40784		9	0	12	0	34.5
4	1.02339	0.902507	0.957932	0.852337	1.30803		10	0	8	0	63.5
5	1.00801	1.10865	1.07507	1.14954	1.33107		32.5	1	19	1.5	16.5
6	1.01145	0.898832	NaN	1.05011	1.33349		28	1.5	NaN	2	26
7	NaN	0.82301	NaN	NaN	NaN		NaN	0	NaN	NaN	NaN
