# Supplementary material for: A bidirectional network for appetite control in larval zebrafish
Source: eLife. 2019 Oct 18;8:e43775. doi: 10.7554/eLife.43775 (PMC6799978; doi:10.7554/eLife.43775)
Supplement: Figure 4—source data 1. [file elife-43775-fig4-data1.xlsx]

## Sheet: Sheet1
Mean fluorescence					Cell Count
cH	Control	Para	Artemia
1	1.01503	1.0004	0.801886
2	1.10946	0.725311	0.927161
3	1.228	0.959089	1.05386
4	1.10447	0.927561	0.88059
5	0.907762	0.859319	1.15672
6	0.872522	0.860026	1.02003
7	0.996959	0.895462	1.16117
8	0.895346	0.839726	0.987948
9	0.870476	0.833761	1.11309
10	nan	nan	0.921801
11	nan	nan	0.991244
mLH	Control	Para	Artemia		Control	Para	Artemia
1	0.843908	1.51457	1.31916		3	57.5	51
2	0.87965	2.18659	1.15887		4	119.5	39
3	0.948201	1.92887	1.27776		4	163	40
4	0.976863	1.45743	1.47148		4	57.5	41.5
5	0.914133	1.7256	1.68486		0	109	50.5
6	1.04888	1.63832	1.32917		1.5	94.5	58.5
7	1.19677	1.62649	1.28792		11.5	111	30.5
8	1.06418	1.78059	1.04343		2.5	190.5	23
9	1.12742	1.67752	1.3276		2.5	130	38.5
10	NaN	NaN	1.28117		NaN	NaN	35.5
11	NaN	NaN	1.12151		NaN	NaN	32
	Control	Para	Artemia		Control	Para	Artemia
lLH	0.863938	1.32684	1.1882		0	19.5	12
	0.876647	1.68263	0.942943		0.5	52	3.5
	0.930306	1.56523	1.18773		0	67	7.5
	0.989445	1.24817	1.37009		0	23	16
	0.956489	1.45651	1.42411		0	57	5.5
	1.03994	1.37945	1.1653		0.5	38	3.5
	1.19324	1.5821	1.105		1.5	73.5	5.5
	1.00995	1.20598	0.977419		0	24.5	1.5
	1.14005	1.3325	1.25439		0.5	26	8.5
	NaN	NaN	1.14586		NaN	NaN	6.5
	NaN	NaN	0.985543		NaN	NaN	4
