# Supplementary material for: A bidirectional network for appetite control in larval zebrafish
Source: eLife. 2019 Oct 18;8:e43775. doi: 10.7554/eLife.43775 (PMC6799978; doi:10.7554/eLife.43775)
Supplement: Figure 5—source data 1. [file elife-43775-fig5-data1.xlsx]

## Sheet: image cH
Activate cH, Image cH
Image cH
Maximum df/f			Sum df/f			Mean df/f
Pre	Post		Pre	Post		Pre	Post
-0.294277	0.619053		10.4218	24.4541		-0.359177	0.221013
0.597924	0.376769		18.9175	11.9501		0.153179	0.0287778
0.308225	0.117763		12.089	7.59812		-0.0417523	-0.0357702
0.117763	0.230957		7.20014	5.76952		-0.0440095	0.0378001
-0.0748976	0.414254		4.43391	10.8666		-0.151309	0.056899
0.0470078	0.582187		13.331	18.816		-0.116067	0.0971035
-0.193087	0.138166		7.04028	10.146		-0.242694	-0.000980093
0.11456	0.328886		10.211	16.2551		-0.0237072	0.192228
0.135243	0.219226		5.19803	5.12067		-0.00583862	0.0303842
0.0075654	0.166893		6.98755	7.16176		-0.081939	-0.00449595
-0.181222	0.434827		8.57527	17.2561		-0.296624	0.0921634
0.648746	0.743321		19.5455	23.5169		0.243655	0.0799955
0.0575696	0.444822		23.881	16.6022		-0.288641	0.0582398
-0.0230159	0.163877		1.73381	9.39759		-0.0596979	0.0112713
0.0641857	0.435662		6.13179	20.4724		-0.0379872	0.141219
-0.0053707	0.287089		11.5547	14.4647		-0.0893855	0.104416
0.015534	0.167004		10.7048	9.20637		-0.0824978	0.0361176
0.908485	-0.0333022		26.3203	10.5046		0.0797173	-0.0902758
-0.0603336	0.415916		12.9518	17.0338		-0.110668	0.0605918
0.0357319	0.319733		5.83052	15.586		-0.0449559	-0.0133951
-0.0625598	0.108187		13.2097	5.82387		-0.113174	-0.00369292
0.0316149	0.379535		14.7206	16.379		-0.126299	0.130295
0.100857	0.247623		15.6479	13.5694		-0.114057	0.110056
0.101775	0.505388		5.62586	17.1387		-0.00479822	0.135699
-0.102004	0.514664		28.692	26.6746		-0.248516	0.223321
-0.201409	0.0603686		7.33584	18.6236		-0.252483	-0.133085
0.09889	0.334566		4.38968	11.9863		0.012881	0.0588937
0.2214	0.248534		17.4136	13.2512		0.03465	0.0903816
0.0919081	0.266639		9.10716	12.0933		-0.0517558	-0.00700168

## Sheet: image LH
Activate cH, Image LH
Image mLH									Image lLH
Maximum df/f			Sum df/f			Mean df/f			Maximum df/f			Sum df/f			Mean df/f
Pre	Post		Pre	Post		Pre	Post		Pre	Post		Pre	Post		Pre	Post
0.170793	0.100619		2.79364	1.97429		0.0956758	0.0138964		0.998518	-0.00708137		5.65569	6.31871		0.167277	-0.0741313
0.0582326	0.127616		3.07545	4.12574		-0.0240786	-0.0378642		1.10528	-0.0555206		13.9873	8.34117		0.0361271	-0.0979526
0.161777	0.078559		5.38308	3.01537		-0.0463504	-0.0261238		1.26598	-0.057539		14.1173	7.55711		0.0365896	-0.0887753
0.102501	0.164987		1.63502	2.58077		-0.00202184	-0.00353408		0.952843	0.283317		11.8138	6.28971		0.0608566	-0.0490453
0.172398	0.0568568		3.81463	1.38428		-0.00794297	-0.00345551		0.562558	0.179541		7.43146	5.193		-0.00362844	-0.0451362
0.0278458	0.0475365		2.16422	1.18444		-0.0224273	0.00842246		0.911476	-0.0292776		9.61396	4.04491		0.0604105	-0.0475755
0.113602	0.106196		2.13652	1.72126		0.0146415	0.0172904		0.453355	0.102795		6.39846	2.13859		0.0460134	-0.00662495
0.0437819	0.101356		2.28071	2.39398		-0.023319	-0.00740843		0.200722	0.147317		3.06183	3.24656		-0.0119403	-0.0136676
0.0443896	0.120344		1.90818	2.387		-0.0177663	-0.005462		0.274746	0.160532		4.71753	3.13864		0.000664939	-0.0184118
0.046634	0.0893106		1.94031	2.37934		-0.0133811	-0.018205		0.046096	0.0576702		2.70401	3.17657		-0.0307489	-0.0280503
0.402831	0.138291		5.44636	2.4949		0.0416952	0.00465989		0.0426387	0.357524		2.29997	3.17991		-0.0251044	0.0132315
0.0349172	0.0753279		2.08133	2.02274		-0.0212172	-0.00586871		0.407752	0.507613		3.22938	3.85426		-0.00242753	0.0265344
0.0854647	0.069479		2.35707	2.04515		-0.0200016	-0.00620383		0.34826	0.176819		3.26219	2.06106		0.00429542	-0.000577369
0.0800173	0.0911006		5.87011	3.01451		-0.0651154	-0.0267934		0.209976	0.413882		10.0457	6.05377		-0.103005	-0.0230553
0.0962228	0.109663		2.52041	2.19972		-0.0147993	0.0178687		0.138353	0.507087		4.69713	4.43929		-0.0432318	0.0405697
0.1994	0.237472		2.44932	4.41394		0.0226341	0.0520224		0.109751	0.143179		1.45609	2.73944		-0.00016569	0.0213966
0.531641	0.0824589		8.92885	2.26496		0.105225	0.0198675		1.02148	0.569808		11.9522	6.32839		0.142644	0.0714616
0.374564	0.251948		5.63397	3.61832		0.0570373	0.02996		1.04382	0.200738		14.6538	4.36692		0.175769	0.0489721
0.110015	0.0844771		4.27441	2.05903		-0.0238323	0.00529163		0.414685	0.22477		4.61401	2.87567		0.0335955	-0.00391406
0.142298	0.0770103		3.0189	2.89108		0.000499024	-0.0198431		0.973185	0.0676908		8.7523	3.13349		0.0867977	-0.0266389
0.233875	0.345429		4.94954	8.24122		-0.0155959	0.0763431		0.0868489	0.584936		3.51236	6.33974		-0.020755	0.0258757
0.668515	0.166088		12.6624	7.25251		0.104755	-0.0574382		0.115917	0.3578		5.81762	7.67005		-0.0553017	-0.0450447
0.378726	0.0874919		10.9357	8.21703		-0.0547322	-0.0898958		-0.0113691	0.663063		9.3193	8.3576		-0.112465	-0.0633582
-0.00608316	0.0579877		4.64823	3.59315		-0.0500998	-0.0229402		0.0789138	0.150358		5.37205	3.71554		-0.0525218	-0.0270568
0.0848032	0.145868		1.88408	2.69656		0.00527477	0.0182552		0.133287	0.240901		2.78513	3.43802		-0.0136127	0.0182428
0.0497907	0.235867		1.57862	4.60522		-0.00349134	0.0423484		0.202408	0.494862		2.72035	5.63043		0.00183441	0.0419777
0.0736306	0.213934		3.08244	4.57379		0.00754497	0.0322092		0.308082	0.232439		4.33609	4.28475		0.0309632	0.0239022
0.192296	0.0915729		3.23237	3.46853		0.0151577	0.0141905		0.252343	0.253606		4.36434	3.35712		0.0178211	-0.0072789
0.13187	0.0610951		3.06319	2.14317		0.00233485	-0.00112205		1.56654	0.113995		17.7004	3.20384		0.156052	-0.0184378
0.162864	0.123801		3.06592	2.48695		-0.00330342	-0.00251156		0.154435	0.197877		4.59259	5.51921		-0.0321042	-0.0292681
0.222145	0.0726876		3.45472	3.75845		-0.0138135	-0.014307		0.202673	0.106298		7.01675	4.86571		-0.056987	-0.0376705
0.106504	0.0718138		2.54772	2.74424		-0.0158777	-0.0171208		0.796859	0.05317		8.23857	3.47281		0.0321552	-0.0375664
0.0291292	0.119073		2.79172	2.47581		-0.0300295	0.00391675		0.164367	0.0346685		3.5449	2.75963		-0.0255665	-0.0285247
0.090214	0.0727937		2.0244	2.26534		-0.000993403	-0.0123292		0.368166	0.203655		4.16547	3.28171		-0.0122309	-0.0147293
0.016015	0.293244		2.66413	4.29266		-0.0288617	0.028		0.121955	0.397896		3.69765	3.06249		-0.0341038	-0.000634176
0.0881369	0.0640322		2.14737	2.4651		-0.00334849	-0.010717		0.397896	0.238238		4.0037	3.52912		-0.00963397	-0.0143446
0.237819	0.0815117		3.4216	2.15547		-0.00172838	-0.00295624		1.36789	0.64234		10.5246	5.04242		0.0496395	0.00301169
0.216298	0.107508		3.27953	1.82093		0.00572101	0.00755755		1.20141	0.0693666		9.68718	2.83541		0.0499054	-0.0287717
0.128017	0.0801832		2.70019	1.79848		0.00904143	0.00377493		0.519361	0.0550454		5.74771	2.865		-0.00981077	-0.0282594
0.0559375	0.345942		2.19205	3.85872		-0.017141	0.0256053		0.0156556	1.59826		3.59929	10.1275		-0.0407277	0.0753507
0.122714	0.0563693		2.47203	2.24254		0.0275227	-0.00831456		0.849187	0.0466561		7.57879	2.45775		0.0243832	-0.0229682
0.086032	0.0339101		2.37049	1.99906		-0.003794	-0.017575		0.90815	0.00622398		7.35306	2.67581		0.0385968	-0.0309618
0.0976409	0.0270613		1.95005	2.63178		-0.00654348	-0.0290984		0.597654	0.10246		6.20065	2.48863		0.0368369	-0.0176203
0.0573597	0.075251		1.90102	2.54415		-0.0175654	-0.017197		0.472384	0.0510049		5.45442	2.66267		0.00835173	-0.0242214
0.0881602	0.0318731		2.02482	1.96016		-0.0055151	-0.0199372		0.067435	0.0336303		1.70605	2.28357		-0.00432557	-0.0225933
0.0728062	0.350924		1.65989	5.06498		0.0132064	0.0567531		0.444124	0.0652152		4.11153	1.51875		0.0109887	0.00918476
0.111352	0.208021		4.14899	4.63107		-0.0176666	-0.00285061		0.0140756	0.0833374		2.95579	2.52219		-0.0337653	-0.00587099
0.269259	0.181884		4.16479	4.04843		-0.0241914	-0.00703908		0.90754	0.114622		4.69601	3.32647		-0.0147796	-0.0207043
0.57924	0.548058		7.96663	8.74655		0.0590331	0.0616939		0.463207	0.205765		5.85011	3.15076		0.0492454	0.00746846
0.103182	0.225356		2.57427	4.21382		0.00743755	-0.00038113		0.0392521	0.128368		2.03504	3.46063		-0.0165033	-0.0147092
0.0297507	0.15643		4.40068	2.86866		-0.049324	-0.000277817		0.162664	0.0725485		5.22486	3.63939		-0.0444767	-0.0319105
0.345099	0.246029		4.98389	3.9064		-0.020602	0.00418364		0.208914	0.164618		4.84881	4.21143		-0.0354914	-0.0217948
0.277698	0.18431		8.03318	7.13728		-0.0440337	-0.0545232		0.0186927	0.0537685		5.23911	3.2213		-0.0590436	-0.027132
0.153262	0.150054		5.0113	6.15068		-0.0333839	-0.0393385		2.61271	0.150903		28.3027	4.29399		0.27118	-0.0270516
0.0325902	0.163416		5.55325	4.54863		-0.0620782	-0.0291187		0.237493	0.806983		5.486	8.56445		-0.0415478	0.0242983
0.98624	0.789499		11.5011	14.8504		0.0675792	0.160416		0.100772	0.215252		4.63431	4.56543		-0.0391277	0.0347718
0.304484	0.200719		5.26495	5.98404		0.00910032	-0.00691087		0.153285	1.42701		4.06045	12.4601		-0.0236944	0.0744785
0.297664	0.421774		6.88666	8.19301		-0.00290886	-0.0160895		0.565434	0.324795		7.31281	5.87993		-0.00319566	0.0104195
0.163409	0.249005		2.91682	3.22438		0.0186108	-0.0244799		0.106068	0.12199		2.04145	1.40016		-0.00265145	0.00296181
0.343933	0.159709		4.71143	2.01205		-0.00279096	-0.00803665		1.26828	0.234366		7.15138	3.3292		0.10926	0.0499166
0.263395	0.184203		3.77676	4.8374		-0.0188756	-0.0539448		0.656465	0.116808		4.89954	1.68703		0.0679725	0.00128119
0.255584	0.379373		5.59853	5.38031		-0.00632078	-0.0390734		1.09533	0.171416		6.37979	3.42125		0.0551907	-0.0324014
0.0657669	0.0980769		2.84663	1.78858		-0.0319439	-0.0117321		0.428873	0.805002		4.13947	5.17794		-0.0144197	0.0213759
0.288044	0.206228		3.20659	2.12718		0.036388	0.0187561		0.470565	0.620989		5.22719	5.2198		-0.0211753	0.00269741
0.11527	0.0197737		3.44498	3.47691		-0.00450151	-0.030577		0.693549	0.0508023		5.91919	3.53599		0.0341094	-0.0277624
0.0493379	0.117919		4.05584	4.50074		-0.0305159	-0.0215792		0.267119	0.659488		4.83926	8.40741		-0.0167897	0.00533761
0.290853	0.0668609		5.96664	2.87951		0.0175535	-0.00948629		0.460195	0.00487633		9.8289	7.27695		0.0103998	-0.0658102
0.212679	0.113319		4.46	4.10965		-0.0170253	-0.0219631		0.285376	0.141739		8.20424	8.29644		-0.0255878	-0.0544627
0.0498844	0.11686		2.82863	2.90481		-0.019145	0.00111245		0.418071	0.600453		11.1196	11.44		-0.0670731	-0.0377009
0.38056	0.182205		4.64201	3.43768		-0.00832515	0.0178387		1.45078	0.901638		25.8247	13.4746		0.0409243	0.120032
0.116515	0.220454		2.75733	3.88634		0.00845401	-0.0100543		0.542928	0.261094		8.49018	6.50363		0.00316305	-0.0230531
0.125845	0.100861		3.76252	4.46697		0.0043747	-0.0323787		0.537412	0.295623		8.38333	6.76027		0.0128193	-0.0231509
0.0634123	0.10541		3.37348	3.5791		-0.026318	-0.0219846		0.254678	0.367381		6.04706	7.37594		-0.023179	-0.0161812
0.0939543	0.124713		3.46518	3.49243		-0.022194	0.00703705		0.581759	0.40791		8.50467	6.30712		0.00646195	0.0292656
0.225653	0.101343		4.01463	3.11882		-0.00600695	-0.00970436		0.307145	0.15722		6.19222	3.89344		-0.00146175	-0.019019
0.183938	0.104248		3.50627	3.41822		-0.00101564	-0.00974258		0.907116	0.164722		9.29276	3.91612		0.0602407	-0.0109046
0.23727	0.0831394		4.95417	3.5047		0.00988819	-0.0185629		0.949291	0.0492375		13.4221	3.11739		0.0674747	-0.0252474
0.0963076	0.178999		3.86604	4.00607		-0.0240015	0.0163876		0.0706288	0.148746		3.14316	4.16844		-0.0222697	-0.0104125
0.190446	0.0885414		4.73963	3.32344		-0.0165962	-0.0121698		0.159551	0.0262483		4.0656	3.11394		-0.0143481	-0.0259883
0.174079	0.184306		4.49849	4.07917		-0.00111263	0.00192778		1.14371	0.421488		15.8015	4.08117		0.102966	-0.0180809
0.146131	0.312238		5.00416	7.88145		0.00298857	0.0215455		0.441901	0.176503		6.87349	4.99324		0.00635422	-0.0364631
0.110465	0.296669		4.7136	5.14621		-0.026012	-0.00847544		0.964831	0.0251172		11.8512	6.6908		0.0316097	-0.060818
0.0376913	0.271321		3.31104	6.28325		-0.0135279	0.0261319		0.042823	1.02845		4.13758	9.05874		-0.0343023	0.0574321
0.106632	0.202159		2.72439	4.45016		-0.00668857	0.000376365		0.86256	0.229338		8.52956	4.35853		0.0445414	-0.00557278
0.0775938	0.378994		2.63757	4.87932		-0.00683401	0.0381085		0.115466	0.713235		3.99166	7.01018		-0.0130056	0.0303726
0.193984	0.212292		4.25563	3.70005		-0.0100627	0.0177204		0.240337	0.101501		5.24721	4.26668		-0.0227676	-0.00927074
0.13352	0.184643		3.42385	5.44846		-0.00530261	0.0490318		0.695308	0.609357		9.38253	6.54172		0.0129925	0.0265428
0.042324	0.318234		4.27936	7.11794		-0.0379932	0.0522725		0.366294	0.178075		5.49667	3.94134		-0.0085599	0.00566749
0.0402616	0.180947		2.07677	3.09801		-0.0126177	0.00255829		0.0300688	0.055856		2.56046	2.57995		-0.0230297	-0.0148104
0.0413247	0.134396		2.5032	2.46333		-0.0180314	0.00425235		0.255639	0.443597		3.7314	4.39204		-0.0125502	0.0199914
0.070108	0.0904989		2.20631	2.6778		-0.00486338	-0.0121989		0.185197	0.291069		4.14086	4.32123		-0.0113069	-0.00434312
0.0732683	0.170629		2.72576	3.80099		-0.0178888	-0.00385833		0.0538567	0.093054		3.59073	3.31576		-0.0312402	-0.0169795
0.0647391	0.161034		3.09708	3.17493		-0.0242613	0.00476585		0.0876528	0.397891		3.24346	4.04239		-0.0158022	0.00949486
0.11289	0.130752		2.47662	2.99639		0.0122313	-0.00666104		0.879262	0.0488803		8.94635	2.51451		0.0614045	-0.0181517
0.0635217	0.170517		2.32744	2.96463		-0.00347904	0.00555032		0.090236	0.0966012		2.37036	2.92039		-0.0113985	-0.00773548
0.195738	0.219326		3.70168	3.65786		0.0197808	-0.0031421		0.638906	0.112109		9.27317	2.69945		0.0726634	-0.0105435
0.0990684	0.197945		2.44949	2.82719		-0.0151023	0.000210808		0.122359	0.311661		3.68635	3.82745		-0.0259227	-0.000188932
0.143931	0.275806		3.15139	3.32443		0.00452109	0.0170737		0.369266	0.449687		4.54982	6.07974		0.0042795	0.04192
0.381314	0.0761945		7.50201	3.76215		-0.00099609	-0.0292481		1.00638	0.20731		13.3381	5.36888		-0.0400856	-0.0434102
0.0689419	0.281404		4.25307	5.02122		-0.0389582	0.0176412		0.155095	0.257684		3.09295	4.02177		-0.00313829	0.0330302
0.266104	0.180726		5.02532	3.71297		0.0290024	0.0258584		1.10185	0.299253		13.6531	8.21134		0.148609	0.0898464
0.318909	0.215555		5.31048	3.23647		0.0470939	0.0190359		0.233898	0.304428		6.1326	6.11015		0.0641222	0.0628665
0.198819	0.291524		7.2301	4.37647		0.0674859	0.0143853		0.352636	1.10184		7.34431	9.66645		0.0772796	0.103268
0.450449	0.218757		6.2105	4.28267		0.0461285	-0.00938083		1.26872	0.201316		16.1116	4.10446		0.171623	0.018656
0.161133	0.631081		3.59638	5.47268		-0.0154607	0.0236009		0.316162	0.545219		4.31085	4.37472		-0.000542438	0.0117226
0.163147	0.240656		3.92585	4.40143		-0.015925	0.0175019		0.136771	0.111763		3.97243	3.58022		-0.00603075	-0.0198098
0.214319	0.17684		5.47667	6.08336		-0.00745082	-0.0419611		0.937855	0.114074		14.2448	6.42947		0.089289	-0.0479614
0.262352	0.154708		5.64426	4.55921		-0.0313449	-0.0210841		0.102789	0.694522		7.65728	10.965		-0.0726341	-0.0480661

## Sheet: Control
Activate preoptic, Image LH
Image mLH									Image lLH
Maximum df/f			Sum df/f			Mean df/f			Maximum df/f			Sum df/f			Mean df/f
Pre	Post		Pre	Post		Pre	Post		Pre	Post		Pre	Post		Pre	Post
0.136973	0.140863		3.95443	2.63428		0.0401075	8.3836e-05		0.201535	0.288244		2.90943	5.06463		0.0233951	0.0325698
0.0146717	0.0815829		3.97903	2.63296		-0.0400957	-0.00918774		0.316371	0.0283955		3.97553	3.32728		-0.00328489	-0.0326816
0.032259	0.0517885		1.92042	3.18123		-0.0134625	-0.0281606		0.32574	0.137079		3.82415	3.33831		0.00530237	-0.0297962
0.0463291	0.147735		2.06811	3.81685		-0.0117306	0.0119183		0.127072	0.093355		2.88884	2.56544		-0.0202498	-0.0178002
0.253506	0.0915252		6.74258	2.52809		0.0509336	0.00896184		1.11806	0.682784		11.8731	6.02748		0.0881557	-0.0021065
0.0546509	0.0457927		2.51246	2.23936		-0.0193843	-0.0133208		-0.0121306	0.0611476		4.4385	3.49036		-0.0457587	-0.0298356
0.403204	0.243773		6.50267	3.87428		0.0382737	0.000253249		0.107121	0.0623387		3.02957	3.42393		-0.0237336	-0.0290245
0.0693879	0.174625		2.81307	3.49956		-0.0199597	-0.00580198		0.256953	1.96108		5.17596	21.0854		0.00598813	0.133993
0.0957665	0.0916901		2.05592	1.71892		0.0141651	-0.000213889		0.506454	0.0189908		4.08854	1.8916		0.0249413	-0.0187769
0.0769172	0.0408634		2.25545	1.70808		-0.0111356	-0.0128517		0.0790778	0.455057		2.64741	3.46806		-0.0222527	-0.00365893
0.0855044	0.134103		2.35603	2.36654		-0.00920165	0.0124022		0.093179	0.659614		2.46409	4.13169		-0.0137487	0.0117165
0.0607571	0.172823		1.82556	2.5138		0.000146446	0.00479107		0.171343	0.278282		2.94345	2.74098		-0.0107797	0.0013561
0.0627622	0.0451026		2.5673	2.14661		-0.0189442	-0.0169193		0.226953	0.257439		2.56219	2.58093		-0.00576183	-0.000152026
0.0752339	0.0882124		1.90752	1.80015		-0.00603642	0.00694625		0.0510168	0.0536215		1.49698	1.17998		-0.0107652	0.00497
0.0384529	0.173251		2.63125	2.98349		-0.0212179	0.0017515		0.0315285	0.189336		2.80712	3.8018		-0.0222335	-0.00968
0.0784892	0.111212		3.00862	2.85136		-0.0202689	-0.00612599		0.196514	0.121147		4.71666	3.49492		-0.0215046	-0.0180674
0.0566033	0.16562		2.29307	3.67111		-0.0104296	0.00385336		0.0494944	1.2807		4.83334	17.2017		-0.0443642	0.103051
0.172663	0.142741		3.15439	3.53355		0.0158605	0.00172301		0.792877	0.0116668		8.66305	6.27067		0.0263661	-0.0611153
0.0591787	0.309943		2.90762	4.55267		-0.0200658	0.0116122		0.893865	1.27807		14.8893	13.4567		0.0735182	0.044431
0.169852	0.149229		2.98969	3.92874		0.0170529	-0.0100149		0.993342	0.650973		14.1293	12.4211		-0.0126158	-0.0429188
0.0602816	0.227713		2.4842	5.07401		-0.00657358	0.0186862		0.0902336	0.473596		2.32975	6.32995		-0.00893736	0.019329
0.060206	0.332071		4.11882	7.48466		-0.0275153	0.00668013		0.0624138	0.386528		3.80395	6.13019		-0.0278579	-0.000916127
0.0675518	0.210975		4.03101	3.72949		-0.0270856	0.0186176		0.252611	0.221029		6.97482	5.24965		-0.0149697	0.0014831
0.0536656	0.319533		2.18004	5.74158		0.000677269	0.0136211		-0.00468591	0.65021		5.955	9.56426		-0.0540235	0.0667638
0.0709026	0.130558		2.97407	3.0882		0.00375001	0.00982624		0.387194	0.605989		7.39971	7.85084		0.0123146	0.0342053
0.0908081	0.179258		2.86648	5.32135		0.00402914	-0.0118156		0.364393	0.190392		8.25765	5.18966		0.00859278	-0.00122525
0.0663143	0.0604509		2.49314	2.05937		0.00859872	-0.00609651		0.0817057	0.0576446		3.81489	3.33901		-0.0180695	-0.0263363
0.0976013	0.313953		3.03974	4.25138		-0.019815	0.0353244		0.0618853	1.12842		4.95022	8.80362		-0.0428507	0.0547611
0.0516822	0.184236		2.2758	2.96285		-0.010334	0.0145205		0.113036	0.0777789		3.42461	3.34724		-0.00984098	-0.0148756
0.0266396	0.171898		2.61114	3.4539		-0.0225828	0.0149509		0.0751504	0.345119		4.07697	4.43993		-0.030489	0.012314
0.0350848	0.169992		3.12454	3.00486		-0.0280102	0.0197991		0.0990974	0.286296		3.39309	4.76269		-0.0161095	0.0198333
0.289979	0.302887		3.56026	3.34428		0.00816714	0.000331699		0.74068	0.444262		6.99793	3.96363		0.0403833	0.0129781
0.0386907	0.147018		2.20573	2.66664		-0.0169087	-0.00896042		0.0987356	0.095569		3.37039	3.13947		-0.0154481	-0.00620343
0.0481001	0.20646		2.37328	3.6598		-0.0100374	0.0225066		0.143318	0.493769		4.17564	5.84587		0.0231405	0.0457917
0.0502264	0.203385		2.10841	3.28553		-0.0119141	0.0138753		0.135952	0.373598		3.39675	4.84156		-0.00386447	0.0199191
0.087017	0.158185		2.00889	2.80932		0.0038278	0.0151227		0.040677	0.557843		4.67793	6.12951		-0.0443328	0.011809
0.076313	0.0958586		1.99739	2.14279		-0.00300848	-0.000897735		0.0812636	0.0530415		5.32566	3.29285		-0.0457963	-0.0278975
