# Supplementary material for: A bidirectional network for appetite control in larval zebrafish
Source: eLife. 2019 Oct 18;8:e43775. doi: 10.7554/eLife.43775 (PMC6799978; doi:10.7554/eLife.43775)
Supplement: Figure 6—source data 1. [file elife-43775-fig6-data1.xlsx]

## Sheet: 6a
	30 min Dep.		2 hr Dep.
	ReaChR -	ReaChR +	ReaChR -	ReaChR +
1	0.98089	2.06665	1.01788	2.6418
2	1.77191	0.351855	0.376137	1.46293
3	0.338001	0.368673	0.522649	1.02929
4	0.444742	0.52848	3.12023	1.25186
5	0.931179	1.14087	1.78572	1.08383
6	0.778778	3.07272	1.25785	1.00378
7	1.2023	1.14523	1.77962	1.05204
8	1.53259	1.69832	0.35574	1.02233
9	0.522729	0.893754	1.28319	0.787232
10	1.04859	1.38106	2.36262	0.168112
11	1.35483	3.72916	0.724556	1.47356
12	0.409496	0.574113	1.14207	0.76529
13	1.68395	1.84789	1.39983	0.596255
14	1.61582	1.14817	1.19742	1.00843
15	0.616011	1.99274	2.81306	1.03174
16	0.575577	1.48565	3.48793	0.797361
17	1.32099	0.452692	2.03974	2.25553
18	0.328684	1.5723	2.47055	3.28237
19	0.887935	1.95774	2.66857	2.50671
20	0.351167	1.36387	1.38428	4.02745
21	1.62097	2.2054	1.29448	1.09646
22	1.37745	1.62663	3.43652	2.67994
23	1.70944	1.83441	1.66752	2.52122
24	0.549865	1.68834	1.45203	2.22769
25	1.04766	1.14277	0.766818	0.851865
26	0.515809	1.59426	NaN	1.84389
27	1.48261	NaN	NaN	1.75065
28	NaN		NaN	2.52754
29	NaN	NaN	NaN	2.78551

## Sheet: 6b
	30 min Dep.			2 hr Dep.
	ReaChR -	ReaChR +		ReaChR -	ReaChR +
1	0.356085	0.454474	1	0.580488	0.792513
2	1.26343	0.950768	2	0.634498	0.258567
3	0.0662804	0.467002	3	1.02037	1.0168
4	2.52951	1.43675	4	0.306566	0.602687
5	3.38104	0.937172	5	0.202413	0.0998973
6	1.64679	1.32513	6	1.11146	0.14873
7	0.766741	0.655369	7	0.338496	1.15428
8	0.200533	1.12602	8	0.219286	1.04516
9	0.324646	0.397896	9	0.450862	0.13784
10	1.00795	0.582304	10	2.75642	0.204429
11	0.43125	0.477206	11	1.38889	1.32552
12	0.464938	0.701999	12	2.33865	0.542931
13	0.5608	0.964534	13	1.65162	0.315798
14	2.11149	0.299419	14	0.352745	0.13318
15	0.838442	0.385654	15	1.21537	0.509785
16	1.20791	0.858914	16	0.155355	0.379678
17	0.39892	NaN	17	0.787876	0.601127
18	0.603241	NaN	18	3.84668	0.500796
19	0.839986	NaN	19	0.0790818	0.203042
			20	1.98993	0.18166
			21	0.753342	0.323069
			22	1.00123	1.22165
			23	0.438932	0.3161
			24	0.139822	0.546941
			25	0.376803	1.37853
			26	0.305157	0.557165
			27	0.194383	0.998197
			28	0.434834	2.13206
			29	2.59423	0.260291
			30	2.33984	0.232897
			31	0.529462	0.231499
			32	1.08871	1.78184
			33	2.08413	0.156412
			34	0.361967	0.307901
			35	0.941475	0.851035
			36	0.294765	1.37848
			37	0.170921	1.27247
			38	1.52331	0.648973
			39	1.69569	0.0687182
			40	2.71737	0.582144
			41	0.397785	0.742677
			42	0.194419	0.396167
			43	1.53012	0.578824
			44	1.33773	0.284718
			45	0.833462	NaN
			46	0.0700919	NaN
			47	2.05353	NaN
			48	1.58161	NaN
			49	0.183601	NaN
			50	0.0713513	NaN
			51	2.09938	NaN
			52	0.972014	NaN
			53	0.267116	NaN

## Sheet: 6c
	Fed		Dep. (2hrs)
	MTZ Control	Ablated	MTZ Control	Ablated
1	0.661341	0.424071	3.97135	7.19911
2	2.6022	0.529873	6.87387	6.73982
3	0.430982	4.31187	5.74528	5.95429
4	1.52307	0.734431	3.14102	2.28777
5	0.374783	0.58103	4.02514	4.02822
6	2.00327	0.598526	6.00157	9.46079
7	0.382967	3.07826	7.74848	3.65244
8	1.94406	2.75148	0.55514	9.76903
9	0.840509	0.570085	3.63593	7.70305
10	1.83347	0.498394	2.81284	3.12018
11	0.104302	0.19241	3.27275	3.35009
12	0.104761	2.35654	2.83387	2.22971
13	0.194283	2.78336	2.33252	6.97623
14	0.485357	7.07618	5.18272	5.16337
15	0.351359	2.14547	1.83673	12.7611
16	0.358854	3.59452	0.78187	4.16454
17	0.861208	1.67218	1.92967	4.66716
18	1.60511	4.24824	0.112698	2.65084
19	2.312	3.54817	0.55997	5.27941
20	1.02611	3.36368	3.75221	4.60081
21	2.18893	0.550115	2.09977	5.33985
22	0.359668	1.278	4.27379	7.93882
23	0.623927	6.67864	NaN	1.32719
24	1.21649	1.03789	NaN	1.96199
25	0.295098	1.9465	NaN	3.50587
26	1.37285	2.98222	NaN	1.35352
27	1.42966	1.21551	NaN	4.32616
28	0.140717	0.793809	NaN	2.08109
29	1.37285	NaN	NaN	3.43077
