# Supplementary material for: A bidirectional network for appetite control in larval zebrafish
Source: eLife. 2019 Oct 18;8:e43775. doi: 10.7554/eLife.43775 (PMC6799978; doi:10.7554/eLife.43775)
Supplement: Supplementary file 2. [file elife-43775-supp2.csv]

ROI name	Signal in ROI	Top Label	Signal	2nd Label	Signal	3rd Label	Signal	4th Label	Signal	5th Label	Signal
Diencephalon - Hypothalamus - Caudal Hypothalamus Neural Cluster	686.7192	Anti-5HT	2.547	EtVmat2-GFP	1.8307	Ptf1aGal4-uasKaede	1.2766	Anti-GlyR	1.0847	Anti-tERK	1.0488
Diencephalon - Caudal Hypothalamus	390.5042	Anti-5HT	2.1255	EtVmat2-GFP	1.6778	Ptf1aGal4-uasKaede	1.2513	Oxtl-GFP	0.9804	SpinalBackfills	0.9481
Diencephalon - Hypothalamus Vglut2 Cluster 5	340.9019	Vglut2a-GFP	1.4676	Ptf1aGal4-uasKaede	1.1425	Gad1b-GFP	1.1094	EtVmat2-GFP	1.0786	Anti-tERK	1.0518
Telencephalon - Olfactory Bulb	51.3372	Vglut2a-GFP	12.1466	Elavl3-GCaMP5G	5.0256	Isl2bGal4-uasDendra	4.7314	Anti-Zn12(Hnk-1)	4.2422	Anti-TH	4.1647
Diencephalon -	37.899	Oxtl-GFP	0.92564	EtVmat2-GFP	0.86116	Ptf1aGal4-uasKaede	0.84391	SpinalBackfills	0.81686	Hcrt-RFP	0.74112
Diencephalon - Dorsal Thalamus	26.3938	Elavl3-GCaMP5G	1.9441	Vglut2a-GFP	1.7361	Anti-Zrf1(GFAP)	1.4478	Elavl3-H2BRFP	1.3471	Olig2-GFP	1.0926
Rhombencephalon - Neuropil Region 5	15.9967	EtVmat2-GFP	1.2437	Anti-5HT	1.1165	Oxtl-GFP	0.96527	Anti-tERK	0.92928	Ptf1aGal4-uasKaede	0.9166
Rhombencephalon - Ventrolateral population of serotonergic neurons	15.8281	Anti-5HT	2.8292	EtVmat2-GFP	2.3208	Ptf1aGal4-uasKaede	1.3701	Anti-tERK	1.0512	Pet1-GFP	0.9924
Rhombencephalon - Rhombomere 1	13.7824	Oxtl-GFP	0.93258	EtVmat2-GFP	0.90292	SpinalBackfills	0.73718	Hcrt-RFP	0.69948	Anti-tERK	0.62916
Diencephalon - Intermediate Hypothalamus	8.1573	Vglut2a-GFP	1.3903	Anti-tERK	1.1963	EtVmat2-GFP	1.0522	Ptf1aGal4-uasKaede	1.0073	Anti-Zn1	0.97696
Diencephalon - Anterior pretectum cluster of vmat2 Neurons	7.6439	Elavl3-GCaMP5G	1.5253	Vglut2a-GFP	1.4666	Elavl3-H2BRFP	1.3404	EtVmat2-GFP	1.2414	Anti-Zrf1(GFAP)	1.2281
Telencephalon -	5.8195	Vglut2a-GFP	12.0703	Elavl3-GCaMP5G	6.6759	Anti-Zn12(Hnk-1)	6.4943	Anti-Gad67	6.216	EtVmat2-GFP	5.9931
Diencephalon - Pituitary	2.4963	Otpb.A-Nsfb-GFP	1.111	Glyt2-GFP	1.0145	Oxtl-GFP	1.0089	Olig2-GFP	1.0039	Hcrt-RFP	0.9859
Telencephalon - Isl1 cluster 2	1.1113	Gad1b-GFP	2.822	Elavl3-H2BRFP	1.4125	Isl1-GFP	1.1028	Anti-Zn1	0.91461	Anti-tERK	0.90095
Mesencephalon - Medial Tectal Band	0.4426	Gad1b-GFP	1.4403	Anti-Zrf1(GFAP)	1.2307	EtVmat2-GFP	1.1843	Anti-Zn1	1.0373	Oxtl-GFP	0.96463
Diencephalon - Preoptic Area	0.1234	Gad1b-GFP	4.54	Elavl3-H2BRFP	2.2911	Isl1-GFP	1.7473	Anti-Zn1	1.4049	Anti-tERK	1.3094
Rhombencephalon -	0.094509	Gad1b-GFP	2.5498	Anti-Zn1	2.4463	EtVmat2-GFP	2.186	Elavl3-GCaMP5G	2.0601	Anti-5HT	1.9775
Mesencephalon -	0.0058088	Gad1b-GFP	4.3832	Elavl3-H2BRFP	3.0669	Anti-tERK	1.2957	Elavl3-GCaMP5G	1.2219	Isl1-GFP	1.2192
